# Supplementary material for: Impact of Technology Adoption on Growth of Micro and Small-Scale Enterprises
Source: Research Square preprint supplement (doi:10.21203/rs.3.rs-8418877/v1), 2026-01-20
Supplement: Supplementary file 1 [file a7b9447e748717be99c4d758.docx]

**12/21/2025**

**Impact of Technology Adoption on Growth of Micro and Small-Scale Enterprises**

**Tadele Alamneh2**

**Email:** [**alamnehtadele@gmail.com**](mailto:alamnehtadele@gmail.com)

**Institutional email:** [**Tadele_Alamneh@edu.edu.et**](mailto:Tadele_Alamneh@edu.edu.et)

**Yimeku Adamu1**

**Email:** [**dessieadamu@gmail.com**](mailto:dessieadamu@gmail.com)

**1Ara Minch University, Ethiopia; 2Debre Markos University, Ethiopia**

a **Corresponding Author’s Email**: [alamnehtadele@gmail.com](mailto:alamnehtadele@gmail.com)

ORCID: https://orcid.org/0000-0001-8450-4764

**Mobile Phone:** +251 918702752

**To** Discover Global Society

**Editor-in-Chief**

**Respected Sir/Madam**

I am writing to submit a research article titled “Impact of Technology Adoption on Growth of Micro and Small-Scale Enterprises” to your esteemed journal. I firmly believe that our work holds substantial professional value and will make a meaningful contribution to the academic discourse. Publishing this paper in your esteemed journal, Discover Global Society, would not only enrich the existing literature but also greatly enhance the reputation and standing of the journal itself. The opportunity to have our research published in Discover Global Society would be a tremendous honor and serve as a testament to the commitment of your journal to promoting global knowledge exchange.

This study investigates how the adoption of various forms of technology influences the growth and development of micro and small-scale enterprises, particularly in emerging economies. Drawing from empirical data and statistical analyses, the paper demonstrates that the integration of digital tools, mobile technologies, and information systems significantly enhances operational efficiency, market access, and scalability of MSEs. The findings contribute to the growing body of literature on entrepreneurship, innovation, and economic development.

We believe this manuscript aligns well with the scope and aims of Discover Global Society, particularly in its focus on technology-led development, small business growth, and socio-economic advancement. The article presents original research, has not been published elsewhere, and is not under consideration by any other publication. We have followed the journal’s submission guidelines and have enclosed all required materials, including the manuscript, tables, figures, and any supplementary information.

Consequently, the paper aims to shed light on these challenges and presents crucial recommendations for their resolution. I would be honored to have the opportunity to work with Discover Global Society and contribute to its library heritage. I truly believe that my manuscript has the potential to captivate readers and add value to your esteemed publishing house.

If my article is accepted, the APC for my article may be covered by one of Springer Nature’s fully open access agreements, because I am from a poor developing country, Ethiopia.

Thank you for considering my request. I look forward to your favorable response.

Sincerely,

Tadele Alamneh (PhD)
